# Supplementary material for: Development of an accurate classification system of proteins into structured and unstructured regions that uncovers novel structural domains: its application to human transcription factors
Source: PubMed Central journal article supplement (PMC2687452; doi:10.1186/1472-6807-9-26), 2009-04-30
Supplement: 1472-6807-9-26-S1.pdf [file 1472-6807-9-26-S1.pdf]

Supplement Table S1: List of proteins with cryptic domains

| family         | name                    | Swiss-Prot      | ENSEMBL         | length | structural domains | ID regions | cryptic domain regions             |
|----------------|-------------------------|-----------------|-----------------|--------|--------------------|------------|------------------------------------|
| AP2            | AP-2 alpha              | AP2A_HUMAN      | ENSP00000259733 | 437    | 239                | 198        | 121-214,268-339,                   |
|                | AP-2 beta               | AP2B_HUMAN      | ENSP00000342252 | 449    | 279                | 170        | 132-265,276-347,                   |
|                | AP-2 gamma              | AP2C_HUMAN      | ENSP00000201031 | 450    | 250                | 200        | 165-269,281-345,                   |
| CTF/NF-1       | NF1-A                   | NF1A_RAT        | ENSP00000294608 | 504    | 184                | 320        | 1-184,                             |
|                | NF1-B                   | NF1B_HUMAN      | ENSP00000341192 | 420    | 185                | 235        | 1-185,                             |
|                | NF1-C                   | NF1C_HUMAN      | ENSP00000342859 | 508    | 182                | 326        | 1-182,                             |
|                | NF1-X                   | NF1X_HUMAN      | ENSP00000264826 | 501    | 183                | 318        | 1-183,                             |
| Homeobox       | AT motif-binding factor | ATBF1_HUMAN     | ENSP00000268489 | 3703   | 1213               | 2490       | 1280-1364,3009-3093,               |
| Myb            | A-Myb                   | MYBA_HUMAN      | ENSP00000332150 | 744    | 243                | 501        | 501-592,                           |
|                | B-myb                   | MYBB_HUMAN      | ENSP00000217026 | 700    | 235                | 465        | 479-562,                           |
|                | C-myb                   | MYB_HUMAN       | ENSP00000340574 | 640    | 219                | 421        | 451-517,                           |
|                | N-CoR1                  | NCOR1_HUMAN     | ENSP00000268712 | 2440   | 265                | 2175       | 236-325,                           |
|                | N-CoR2                  | NCOR2_HUMAN     | ENSP00000348551 | 2514   | 456                | 2058       | 1314-1375,1604-1708,               |
| PHD            | Peregrin                | BRPF1_HUMAN     | ENSP00000306297 | 1214   | 434                | 780        | 340-455,                           |
|                | HRX                     | HRX_HUMAN       | ENSP00000352262 | 3969   | 724                | 3245       | 1872-2079,                         |
| RFX            | RFX1                    | RFX1_HUMAN      | ENSP00000254325 | 979    | 402                | 577        | 570-895,                           |
|                | RFX2                    | RFX2_HUMAN      | ENSP00000306335 | 723    | 389                | 334        | 335-406,420-593,604-672,           |
|                | RFX3                    | RFX3_HUMAN      | ENSP00000265775 | 749    | 400                | 349        | 320-391,404-657,                   |
| TEA            | TEF-1                   | TEAD1_HUMAN     | ENSP00000354588 | 426    | 307                | 119        | 31-119,209-426,                    |
|                | TEF-3                   | TEAD3_HUMAN     | ENSP00000345772 | 434    | 308                | 126        | 30-119,217-434,                    |
|                | TEF-4                   | TEAD4_HUMAN     | ENSP00000352926 | 434    | 301                | 133        | 41-123,217-434,                    |
| bHLH           | C-myc                   | MYC_HUMAN       | ENSP00000259523 | 439    | 142                | 297        | 2-61,                              |
|                | SREBP-1                 | SRBP1_HUMAN     | ENSP00000261646 | 1147   | 569                | 578        | 567-818,864-985,1080-1146,         |
|                | SREBP-2                 | SRBP2_HUMAN     | ENSP00000354476 | 1141   | 501                | 640        | 560-648,660-817,867-945,1076-1140, |
|                | WS-bHLH                 | WBS14_HUMAN     | ENSP00000320886 | 852    | 308                | 544        | 70-186,740-839,                    |
| bZIP           | ATF-6A                  | ATF6A_HUMAN     | ENSP00000263291 | 670    | 172                | 498        | 544-638,                           |
|                | p45 NF-E2               | NFE2_HUMAN      | ENSP00000312436 | 373    | 147                | 226        | 290-370,                           |
|                | NF-E2 related factor    | NF2L1_HUMAN     | ENSP00000323018 | 772    | 212                | 560        | 1-105,                             |
| bZIP-Maf       | MafK                    | MAFK_HUMAN      | ENSP00000344903 | 156    | 119                | 37         | 65-142,                            |
| zf-C2H2/BTB/PO | Miz-1                   | ZBT17_HUMAN     | ENSP00000235455 | 803    | 559                | 244        | 640-711,                           |
|                | Zinc finger protein 278 | ZN278_HUMAN     | ENSP00000266269 | 687    | 454                | 233        | 518-584,                           |
|                | Zinc finger protein 482 | ZN482_HUMAN     | ENSP00000335232 | 424    | 302                | 122        | 208-300,                           |
| zf-C2H2/KRAB   | BRC1744                 | ZNF45_HUMAN     | ENSP00000269973 | 682    | 642                | 40         | 74-142,                            |
|                | eZNF                    | TCF17_HUMAN     | ENSP00000337122 | 605    | 590                | 15         | 55-185,                            |
|                | Zfp-37                  | ZFP37_HUMAN     | ENSP00000259391 | 630    | 580                | 50         | 86-272,                            |
|                | KOX4                    | ZNF7_HUMAN      | ENSP00000320627 | 686    | 663                | 23         | 44-219,                            |
|                | KOX27                   | ZNF43_HUMAN     | ENSP00000352990 | 803    | 749                | 54         | 68-143,                            |
|                | KOX31                   | ZN33A_HUMAN     | ENSP00000304268 | 810    | 760                | 50         | 54-130,167-297,                    |
|                | HPF4                    | ZNF85_HUMAN     | ENSP00000329793 | 594    | 555                | 39         | 72-154,                            |
|                |                         |                 | ENSP00000352919 | 516    | 513                | 3          | 1-70,                              |
|                |                         | ENSP00000347158 | 438             | 418    | 20                 | 56-144,    |                                    |
| zf-C2H2/etc    | basoenuclin-1           | BNC1_HUMAN      | ENSP00000307041 | 994    | 365                | 629        | 32-210,                            |
|                | Ikaros                  | IKAR_HUMAN      | ENSP00000352123 | 519    | 321                | 198        | 225-378,                           |
|                | ZNF133                  | ZN133_HUMAN     | ENSP00000246045 | 653    | 521                | 132        | 144-217,                           |
|                | DB1                     | ZN161_HUMAN     | ENSP00000258963 | 521    | 259                | 262        | 102-175,                           |
|                | ZNF161                  | ZN161_HUMAN     | ENSP00000258963 | 521    | 259                | 262        | 102-175,                           |
|                | HF.10                   | ZNF35_HUMAN     | ENSP00000296092 | 519    | 394                | 125        | 118-182,                           |
| zf-C4          | NR2E1                   | NR2E1_HUMAN     | ENSP00000230083 | 385    | 338                | 47         | 122-183,                           |
|                | NR2E3                   | NR2E3_HUMAN     | ENSP00000317199 | 409    | 338                | 71         | 152-218,                           |
| zf-C2HC        | MyT1                    | MYT1_HUMAN      | ENSP00000354922 | 1121   | 392                | 729        | 1023-1121,                         |
| zf-NF-X1       | NF-X1                   | NFX1_HUMAN      | ENSP00000263220 | 1070   | 648                | 422        | 360-572,                           |
| HMG box        | SOX-5                   | SOX5_HUMAN      | ENSP00000308927 | 763    | 132                | 631        | 160-226,                           |
| YL1            | VPS72                   | VPS72_HUMAN     | ENSP00000295315 | 364    | 63                 | 301        | 167-229,                           |
